# Supplementary material
Source: ML conference proceedings conference paper supplement (https://proceedings.mlr.press/v54/ionescu17a.html)
Supplement: Supplementary file 1 [file ionescu17a-supp.pdf]

---

# Large-Scale Data-Dependent Kernel Approximation

## Appendix

---

This appendix presents the additional detail and proofs associated with the main paper [1].

### 1 Introduction

Let  $k : \mathbb{R}^p \times \mathbb{R}^p \rightarrow \mathbb{R}_+$  be a positive definite translation invariant function e.g. a Gaussian kernel  $k(x, y) = \exp(-\gamma\|x-y\|^2)$ . By Bochner's theorem there exists  $\mu$  a positive function such that

$$k(x, y) = \int_{\omega} e^{i\omega^\top(x-y)} \mu(\omega)$$

Since  $\mu$  is positive we can use it to draw i.i.d. samples  $\omega_i \sim \mu$  which allows us to define a random feature map such that  $\phi(x) = [\phi_1(x) \dots \phi_d(x)]$ , where  $\phi_i(x) = \cos(\omega_i^\top x + b_i)$  (where  $b_i \sim \text{Uniform}[0, 2\pi]$ ). Let  $\hat{k}(x, y) = \sum_i^d \hat{k}_i(x, y) = \frac{1}{d} \sum_i^d \phi_i(x)\phi_i(y)^\top = \frac{1}{d} \phi(x)\phi(y)^\top$ . This is a standard construction; see [2, 3] for more details.

Let  $X$  be a fixed data matrix  $N \times p$  corresponding to  $N$  data points in  $\mathbb{R}^p$  and let the matrix counterparts of the above notation applied to  $X$  be  $K(i, j) = k(X(i, :), X(j, :))$ , as well as  $\hat{K}$ ,  $\hat{K}_i$ ,  $\Phi_i (= \phi_i(X))$  and  $\Phi (= \phi(X))$ .

With this notation we have

$$\hat{K} = \sum_i^d \hat{K}_i = \sum_i^d \Phi_i \Phi_i^\top = \Phi \Phi^\top \quad (1)$$

We notice that  $\hat{K}_i$  are i.i.d. thus matrix concentration results apply to it.

To this end we want to use

**Theorem 1 (Matrix Bernstein [4])** *Let  $Z_1 \dots Z_m$  be independent  $n \times n$  Hermitian random matrices with  $\mathbb{E}[Z_i] = 0$  and  $\|Z_i\| \leq R$ . Let  $\sigma^2 = \max\{\|\sum_i \mathbb{E}[Z_i^\top Z_i]\|, \|\sum_i \mathbb{E}[Z_i Z_i^\top]\|\}$ , where  $\|\cdot\|$  is the operator norm. Then*

$$\mathbb{E}\|\sum_i Z_i\| \leq \sigma\sqrt{3\log(2n)} + R\log(2n) \quad (2)$$

**Theorem 2 ( $\hat{K}$  convergence [3])** *Let  $\hat{K}$  be an  $d$  term random feature approximation of the kernel matrix  $K \in \mathbb{R}^{N \times N}$*

$$\mathbb{E}\|\hat{K} - K\| \leq \sqrt{\frac{3N^2 \log N}{d}} + \frac{2N \log N}{d} \quad (3)$$

**Proof**<sup>1</sup> Then  $\hat{K}_i$  are independent and we know that  $\mathbb{E}[\hat{K}] = K$ .

$$E = \hat{K} - K = \sum_i^d E_i, \quad E_i = \frac{1}{d}(\hat{K}_i - K) \quad (4)$$

Thus  $\mathbb{E}[E_i] = 0$  and  $E_i$  are i.i.d. as well.

First we must show that each are bounded

$$\|E_i\| = \frac{1}{d} \|\Phi_i \Phi_i^\top - \mathbb{E}[\Phi \Phi^\top]\| \leq \frac{1}{d} (\|\Phi_i\|^2 + \mathbb{E}[\|\Phi\|^2]) \leq \frac{1}{d} (\|\Phi_i\|^2 + \|\mathbb{E}[\Phi]\|^2) \leq \frac{2B}{d} \quad (5)$$

---

<sup>1</sup>This is from [3] reproduced for a self-contained understanding of our main results.

where we used first the definitions of  $\widehat{K}_i$  and  $K$ , followed by the triangle inequality, then Jensen for the expected value.  $B$  is a finite bound for  $\|\phi\|$  ( $\|\phi\|^2 \leq B$ ). We know that such a bound exists, by the way  $\phi$  is constructed.

Then the variance of  $E_i$  is

$$\mathbb{E}[E_i^2] = \frac{1}{d^2} \mathbb{E}[(\Phi_i \Phi_i^\top - K)^2] \quad (6)$$

$$= \frac{1}{d^2} \mathbb{E}[(\|\Phi_i\|^2 \Phi_i \Phi_i^\top - \Phi_i \Phi_i^\top K - K \Phi_i \Phi_i^\top + K^2)] \quad (7)$$

$$\preceq \frac{1}{d^2} [BK - 2K^2 + K^2] \preceq \frac{BK}{d^2} \quad (8)$$

where we unravel the square, then use  $\mathbb{E}[\widehat{K}_i] = \mathbb{E}[\Phi_i \Phi_i^\top] = K$ . The second  $\preceq$  is due to  $K$  being positive definite.

$$\|\mathbb{E}[E^2]\| \leq \left\| \sum_i^d \mathbb{E}[E_i^2] \right\| \leq \frac{1}{d} B \|K\| \quad (9)$$

where we first used Jensen's inequality, then the semi-definite bound above with  $d$  terms.

Given these bounds on the variance and the norm of the random variables, we can apply (2) to get

$$\mathbb{E}\|\widehat{K} - K\| \leq \sqrt{\frac{3B\|K\|\log N}{d}} + \frac{2B\log N}{d} \quad (10)$$

## 2 Data-Dependent Kernel

Let  $L$  be the normalized Laplacian i.e.  $L = I - D^{-1/2}WD^{-1/2}$  with  $W$  again some fixed positive definite function of the data and  $D$  a diagonal matrix with the sum of each row of  $W$ . Let  $M = L$  or some positive power of the Laplacian  $M = \alpha L^c$ . Then we define

$$\widetilde{K} = K - K(I + MK)^{-1}MK \quad (11)$$

as a new kernel, similarly to the one defined in [5].

So the goal is to obtain  $\widetilde{\Phi}$  with both some guarantees of consistency and a large deviation bound, in order to characterize the speed of convergence.

To this end we define

$$\overline{K} = \widehat{K} - \widehat{K}(I + M\widehat{K})^{-1}M\widehat{K} \quad (12)$$

and

$$\check{K} = \Phi(I + \Phi^\top M\Phi)^{-1}\Phi^\top \quad (13)$$

The Sherman-Morrison-Woodbury (SMW) identity in its simplest form states that if both  $I + UV^\top$  and  $I + V^\top U$  are invertible then

$$(I + UV^\top)^{-1} = I - U(I + V^\top U)^{-1}V^\top \quad (14)$$

**Proposition 2** *With the definitions above*

$$\overline{K} = \check{K} \quad (15)$$

**Proof**

$$\overline{K} = \widehat{K} - \widehat{K}(I + M\widehat{K})^{-1}M\widehat{K} \quad (16)$$

$$= \Phi\Phi^\top - \Phi\Phi^\top(I + M\Phi\Phi^\top)^{-1}M\Phi\Phi^\top \quad \text{by (1)} \quad (17)$$

$$= \Phi(I - \Phi^\top(I + M\Phi\Phi^\top)^{-1}M\Phi)\Phi^\top \quad (18)$$

$$= \Phi(I + \Phi^\top M\Phi)^{-1}\Phi^\top \quad (19)$$

$$= \check{K} \quad \text{by (13)} \quad (20)$$

Where (19) comes by applying (14) with  $U = \Phi^\top$  and  $V = \Phi^\top M$  and using the symmetry of  $M$ .

So  $\tilde{\Phi} = \Phi(I + \Phi^\top M \Phi)^{-1/2}$  but given (15) we can use  $\bar{K}$  instead of  $\check{K}$  for the convergence proofs. Now the goal is to obtain a bound on  $\mathbb{E}\|\bar{K} - \tilde{K}\|$ .

**Lemma 3** Let  $\bar{K}$  and  $\tilde{K}$  defined as above and denoting  $\mathbb{E}\|\hat{K}M(I + \hat{K}M)^{-1}\| \leq R$  and  $\mathbb{E}\|(I + MK)^{-1}MK\| \leq T$ , with  $R, T$  constants we have that

$$\mathbb{E}\|\bar{K} - \tilde{K}\| \leq \mathbb{E}\|K - \hat{K}\|(1 + T + RT + R) \quad (21)$$

**Proof**

$$\|\bar{K} - \tilde{K}\| = \|\hat{K} - \hat{K}(I + M\hat{K})^{-1}M\hat{K} - K + K(I + MK)^{-1}MK\| \quad (22)$$

$$\leq \|\hat{K} - K\| + \|\hat{K}(I + M\hat{K})^{-1}M\hat{K} - K(I + MK)^{-1}MK\| \quad (23)$$

If we apply the triangle inequality for the second term in the right side of inequality (23) in the form of  $\|A + B + C\| \leq \|A\| + \|B\| + \|C\|$  with,

$$A = \hat{K}(I + MK)^{-1}MK - K(I + MK)^{-1}MK \quad (24)$$

$$B = \hat{K}(I + M\hat{K})^{-1}MK - \hat{K}(I + MK)^{-1}MK \quad (25)$$

$$C = \hat{K}(I + M\hat{K})^{-1}M\hat{K} - \hat{K}(I + M\hat{K})^{-1}MK \quad (26)$$

we obtain the following,

$$\|\hat{K}(I + M\hat{K})^{-1}M\hat{K} - K(I + MK)^{-1}MK\| \leq \|\hat{K}(I + MK)^{-1}MK - K(I + MK)^{-1}MK\| \quad (27)$$

$$+ \|\hat{K}(I + M\hat{K})^{-1}MK - \hat{K}(I + MK)^{-1}MK\| \quad (28)$$

$$+ \|\hat{K}(I + M\hat{K})^{-1}M\hat{K} - \hat{K}(I + M\hat{K})^{-1}MK\| \quad (29)$$

For  $\|A\|$  we obtain the following bound,

$$\|\hat{K}(I + MK)^{-1}MK - K(I + MK)^{-1}MK\| \leq \|\hat{K} - K\| \|(I + MK)^{-1}MK\| \quad (30)$$

For  $\|B\|$  we obtain the following bound,

$$\|\hat{K}(I + M\hat{K})^{-1}MK - \hat{K}(I + MK)^{-1}MK\| = \|\hat{K}(I + M\hat{K})^{-1}M(\hat{K} - K)(I + MK)^{-1}MK\| \quad (31)$$

$$\leq \|\hat{K}(I + M\hat{K})^{-1}M\| \|\hat{K} - K\| \|(I + MK)^{-1}MK\| \quad (32)$$

$$= \|\hat{K}M - \hat{K}M(I + \hat{K}M)^{-1}\hat{K}M\| \|\hat{K} - K\| \|(I + MK)^{-1}MK\| \quad (33)$$

$$= \|\hat{K}M(I + \hat{K}M)^{-1}\| \|\hat{K} - K\| \|(I + MK)^{-1}MK\| \quad (34)$$

In order to obtain eq. (31) we apply the identity  $XZ^{-1}Y - XW^{-1}Y = XZ^{-1}(W - Z)W^{-1}Y$  with  $W = I + MK$ ,  $X = \hat{K}$ ,  $Y = MK$  and  $Z = I + M\hat{K}$ . To reach (33) we apply the SMW identity; for eq. (34) we apply the identity  $Q - Q(I + Q)^{-1}Q = Q(I + Q)^{-1}$  with  $Q = \hat{K}M$ .

For  $\|C\|$  we have the following bound,

$$\|\hat{K}(I + M\hat{K})^{-1}M\hat{K} - \hat{K}(I + M\hat{K})^{-1}MK\| \leq \|\hat{K}(I + M\hat{K})^{-1}M\| \|K - \hat{K}\| \quad (35)$$

$$= \|\hat{K}M - \hat{K}M(I + \hat{K}M)^{-1}\hat{K}M\| \|K - \hat{K}\| \quad (36)$$

$$= \|\hat{K}M(I + \hat{K}M)^{-1}\| \|K - \hat{K}\| \quad (37)$$

For eqs. (36) and (37) we follow the same proof as for eqs. (33) and (34).

We will focus on the first term of the right side of (37).

$$\|\widehat{K}M(I + \widehat{K}M)^{-1}\| \leq \|\widehat{K}\| \|M\| \|(I + \widehat{K}M)^{-1}\| \quad (38)$$

We seek to provide a bound for  $\|(I + \widehat{K}M)^{-1}\|$ . We know that  $\sigma_{max}((I + \widehat{K}M)^{-1}) = \frac{1}{\sigma_{min}(I + \widehat{K}M)}$ , with  $\sigma_{max}(\cdot)$  and  $\sigma_{min}(\cdot)$  being the maximum and minimum singular values, respectively. From [6] (with direct reference to their eq. 3.12) we can write the following inequality (which is valid for any non-singular complex matrix of order  $N$ , in our case  $I + \widehat{K}M$ ), with  $\|\cdot\|_F$  being the Frobenius norm

$$\sigma_{min}(I + \widehat{K}M) \geq |\det(I + \widehat{K}M)| \left( \frac{\sqrt{N-1}}{\|I + \widehat{K}M\|_F} \right)^{N-1} \quad (39)$$

For  $|\det(I + \widehat{K}M)|$  we have the following bound, where  $\lambda_i(\cdot)$  is the  $i^{th}$  eigenvalue

$$|\det(I + \widehat{K}M)| = \left| \prod_i \lambda_i(I + \widehat{K}M) \right| \quad (40)$$

$$= \left| \prod_i (1 + \lambda_i(\widehat{K}M)) \right| \quad (41)$$

$$\geq 1 \quad (42)$$

The last inequality results due to the fact that  $\widehat{K}M$  is positive semi-definite. Thus, (39) becomes

$$\sigma_{min}(I + \widehat{K}M) \geq \left( \frac{\sqrt{N-1}}{\|I + \widehat{K}M\|_F} \right)^{N-1} \quad (43)$$

$$\sigma_{max}((I + \widehat{K}M)^{-1}) \leq \left( \frac{\|I + \widehat{K}M\|_F}{\sqrt{N-1}} \right)^{N-1} \quad (44)$$

We know that the right hand side of (44) is bounded, as  $N$  is the number of data samples, and  $\widehat{K}M$  is positive semi-definite. Given the bounds of  $\|A\|$ ,  $\|B\|$  and  $\|C\|$ , we substitute them in (23). Applying the expectations on both sides, leads to the claim.

**Proposition 3** *Given the results before we can claim  $\mathbb{E}\|\overline{K} - \tilde{K}\| \leq \left( \sqrt{\frac{3N^2 \log N}{d}} + \frac{2N \log N}{d} \right) (1 + T + RT + R)$*

**Proof** Given the bound for  $\mathbb{E}\|\widehat{K} - K\|$ , the claim for deviation is

$$\mathbb{E}\|\overline{K} - \tilde{K}\| \leq \mathbb{E}\|\widehat{K} - K\| (1 + T + RT + R) \quad (45)$$

$$\leq \left( \sqrt{\frac{3N^2 \log N}{d}} + \frac{2N \log N}{d} \right) (1 + T + RT + R) \quad \text{by (3)} \quad (46)$$

Finally note that a convergence rate immediately follows once  $T$  and  $R$  are determined. However, these will depend on the explicit forms of  $K$  and  $M$ , which is beyond the scope of this analysis.

---

## References

- [1] C. Ionescu, A.-I. Popa, and C. Sminchisescu, “Large-scale data-dependent kernel approximation,” in *AISTATS*, 2017.
- [2] A. Rahimi and B. Recht, “Random features for large-scale kernel machines,” in *NIPS*, 2007.
- [3] D. Lopez-Paz, S. Sra, A. Smola, Z. Ghahramani, and B. Schölkopf, “Randomized nonlinear component analysis,” *arXiv preprint arXiv:1402.0119*, 2014.
- [4] L. Mackey, M. I. Jordan, R. Y. Chen, B. Farrell, J. A. Tropp, *et al.*, “Matrix concentration inequalities via the method of exchangeable pairs,” *The Annals of Probability*, vol. 42, no. 3, pp. 906–945, 2014.
- [5] V. Sindhwani, P. Niyogi, and M. Belkin, “Beyond the point cloud: from transductive to semi-supervised learning,” in *ICML*, 2005.
- [6] H.-B. Li, T.-Z. Huang, and H. Li, “Some new results on determinantal inequalities and applications,” *Journal of Inequalities and Applications*, vol. 2010, no. 1, p. 1, 2010.
